# Supplementary material for: Annexin A2 Stabilizes Oncogenic JAG1 Intracellular Domain by Inhibiting Proteasomal Degradation in Glioblastoma Cells
Source: MDPI journal article supplement (doi:10.3390/ijms241914776), 2023-09-30
Supplement: s1 [file s1]

# **Annexin A2 Stabilizes Oncogenic JAG1 Intracellular Domain by Inhibiting Proteasomal Degradation in Glioblastoma Cells**

Seok Won Ham<sup>1,2,3,†</sup>, Jung Yun Kim<sup>1,2,†</sup>, Sunyoung Seo<sup>1,2</sup>, Nayoung Hong<sup>1,2</sup>, Min Ji Park<sup>1,2</sup>, Yoonji Kim<sup>1,2</sup>, Junseok Jang<sup>1,2</sup>, Sehyeon Park<sup>1,2</sup>, Silvee Jisoo Lee<sup>1,2</sup>, Jun-Kyum Kim<sup>3</sup>, Eun-Jung Kim<sup>3</sup>, Sung-Ok Kim<sup>4</sup>, Sung-Chan Kim<sup>4</sup>, Jong-Whi Park<sup>5,\*</sup>, and Hyunggee Kim<sup>1,2,\*</sup>

<sup>1</sup>Department of Biotechnology, College of Life Sciences and Biotechnology, Korea University, Seoul 02841, Republic of Korea

<sup>2</sup>Institute of Animal Molecular Biotechnology, Korea University, Seoul 02841, Republic of Korea

<sup>3</sup>MEDIFIC Inc., Hwaseong-si, Gyeonggi-do 18469, Republic of Korea

<sup>4</sup>Department of Biochemistry, College of Medicine, Hallym University, Chuncheon 24252, Republic of Korea

<sup>5</sup>Department of Life Sciences, Gachon University, Incheon 21999, Republic of Korea

<sup>†</sup>These authors contributed equally to this work.

**\*Correspondence:** Hyunggee Kim (e-mail) [hg-kim@korea.ac.kr](mailto:hg-kim@korea.ac.kr)

(Telephone) +82-02-3290-3059

Jong-Whi Park (e-mail) [jpark@gachon.ac.kr](mailto:jpark@gachon.ac.kr)

(Telephone) +82-032-899-6115



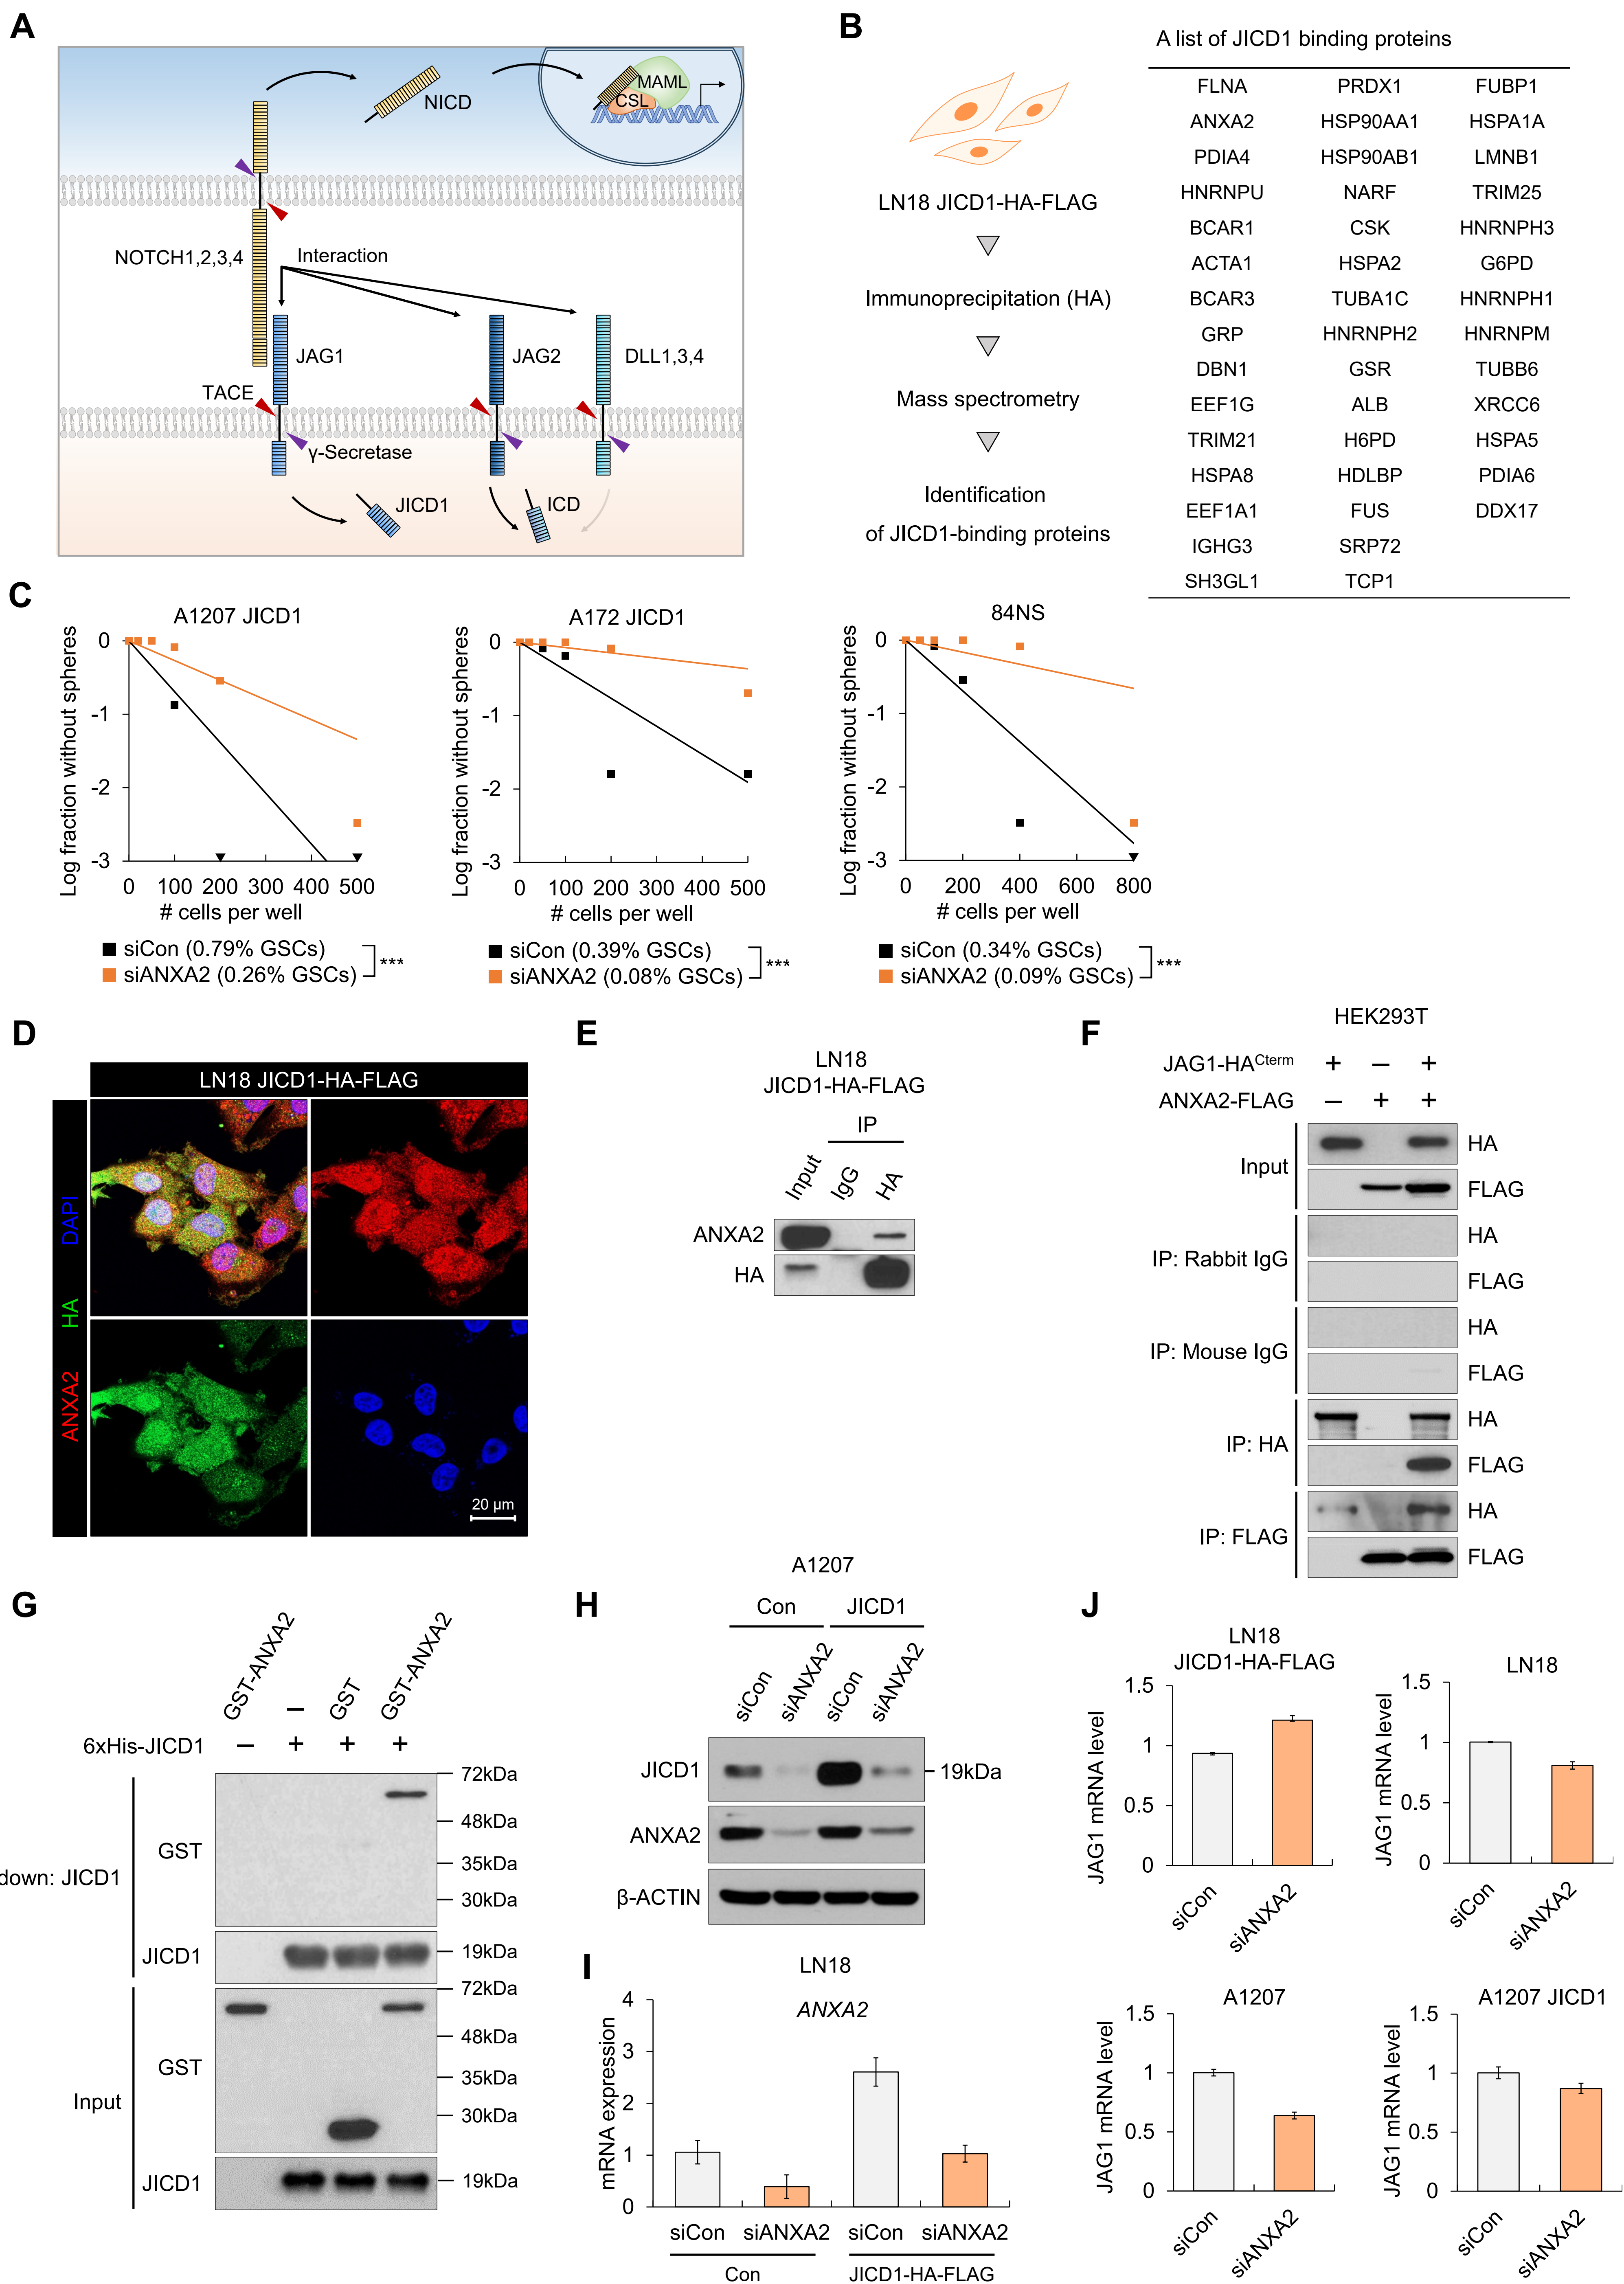

**Supplementary Figure S1. Annexin A2 (ANXA2) is a JAG1 intracellular domain (JICD1)-binding protein.**

- (A) A graphic description of the NOTCH signaling pathway. NICD; NOTCH intracellular domain, CSL; centromere-binding protein 1/suppressor of hairless/lag-1, MSML; mastermind-like protein.
- (B) A schematic presentation of JICD1-binding protein identification and a list of identified proteins.
- (C) Limiting dilution sphere-forming assay performed following ANXA2 knockdown in other JICD1-expressing cell lines. \*\*\* $p < 0.001$ .
- (D) Microscopic images of immunofluorescence staining of HA and ANXA2 in LN18 cells expressing JICD1-HA-FLAG. Scale bar = 20  $\mu\text{m}$ .
- (E) Immunoprecipitation against HA in LN18 JICD1-HA-FLAG cells.
- (F) Immunoprecipitation against HA and FLAG in HEK293T cells transduced with JAG1-HACterm and ANXA2-FLAG.
- (G) In vitro binding assay using the purified recombinant JICD1 and GST-ANXA2. The pull-down against JICD1 in the absence of JICD1 was used as a control.
- (H) Western blotting results showing that ANXA2 knockdown decreases JICD1 protein level in A1207 cells.
- (I) qRT-PCR showing that ANXA2 expression is increased by JICD1 and is downregulated by ANXA2 knockdown.
- (J) qRT-PCR demonstrating the mRNA level following ANXA2 knockdown in LN18 JICD1-HA-FLAG, LN18, A1207, A1207 JICD1 cells.



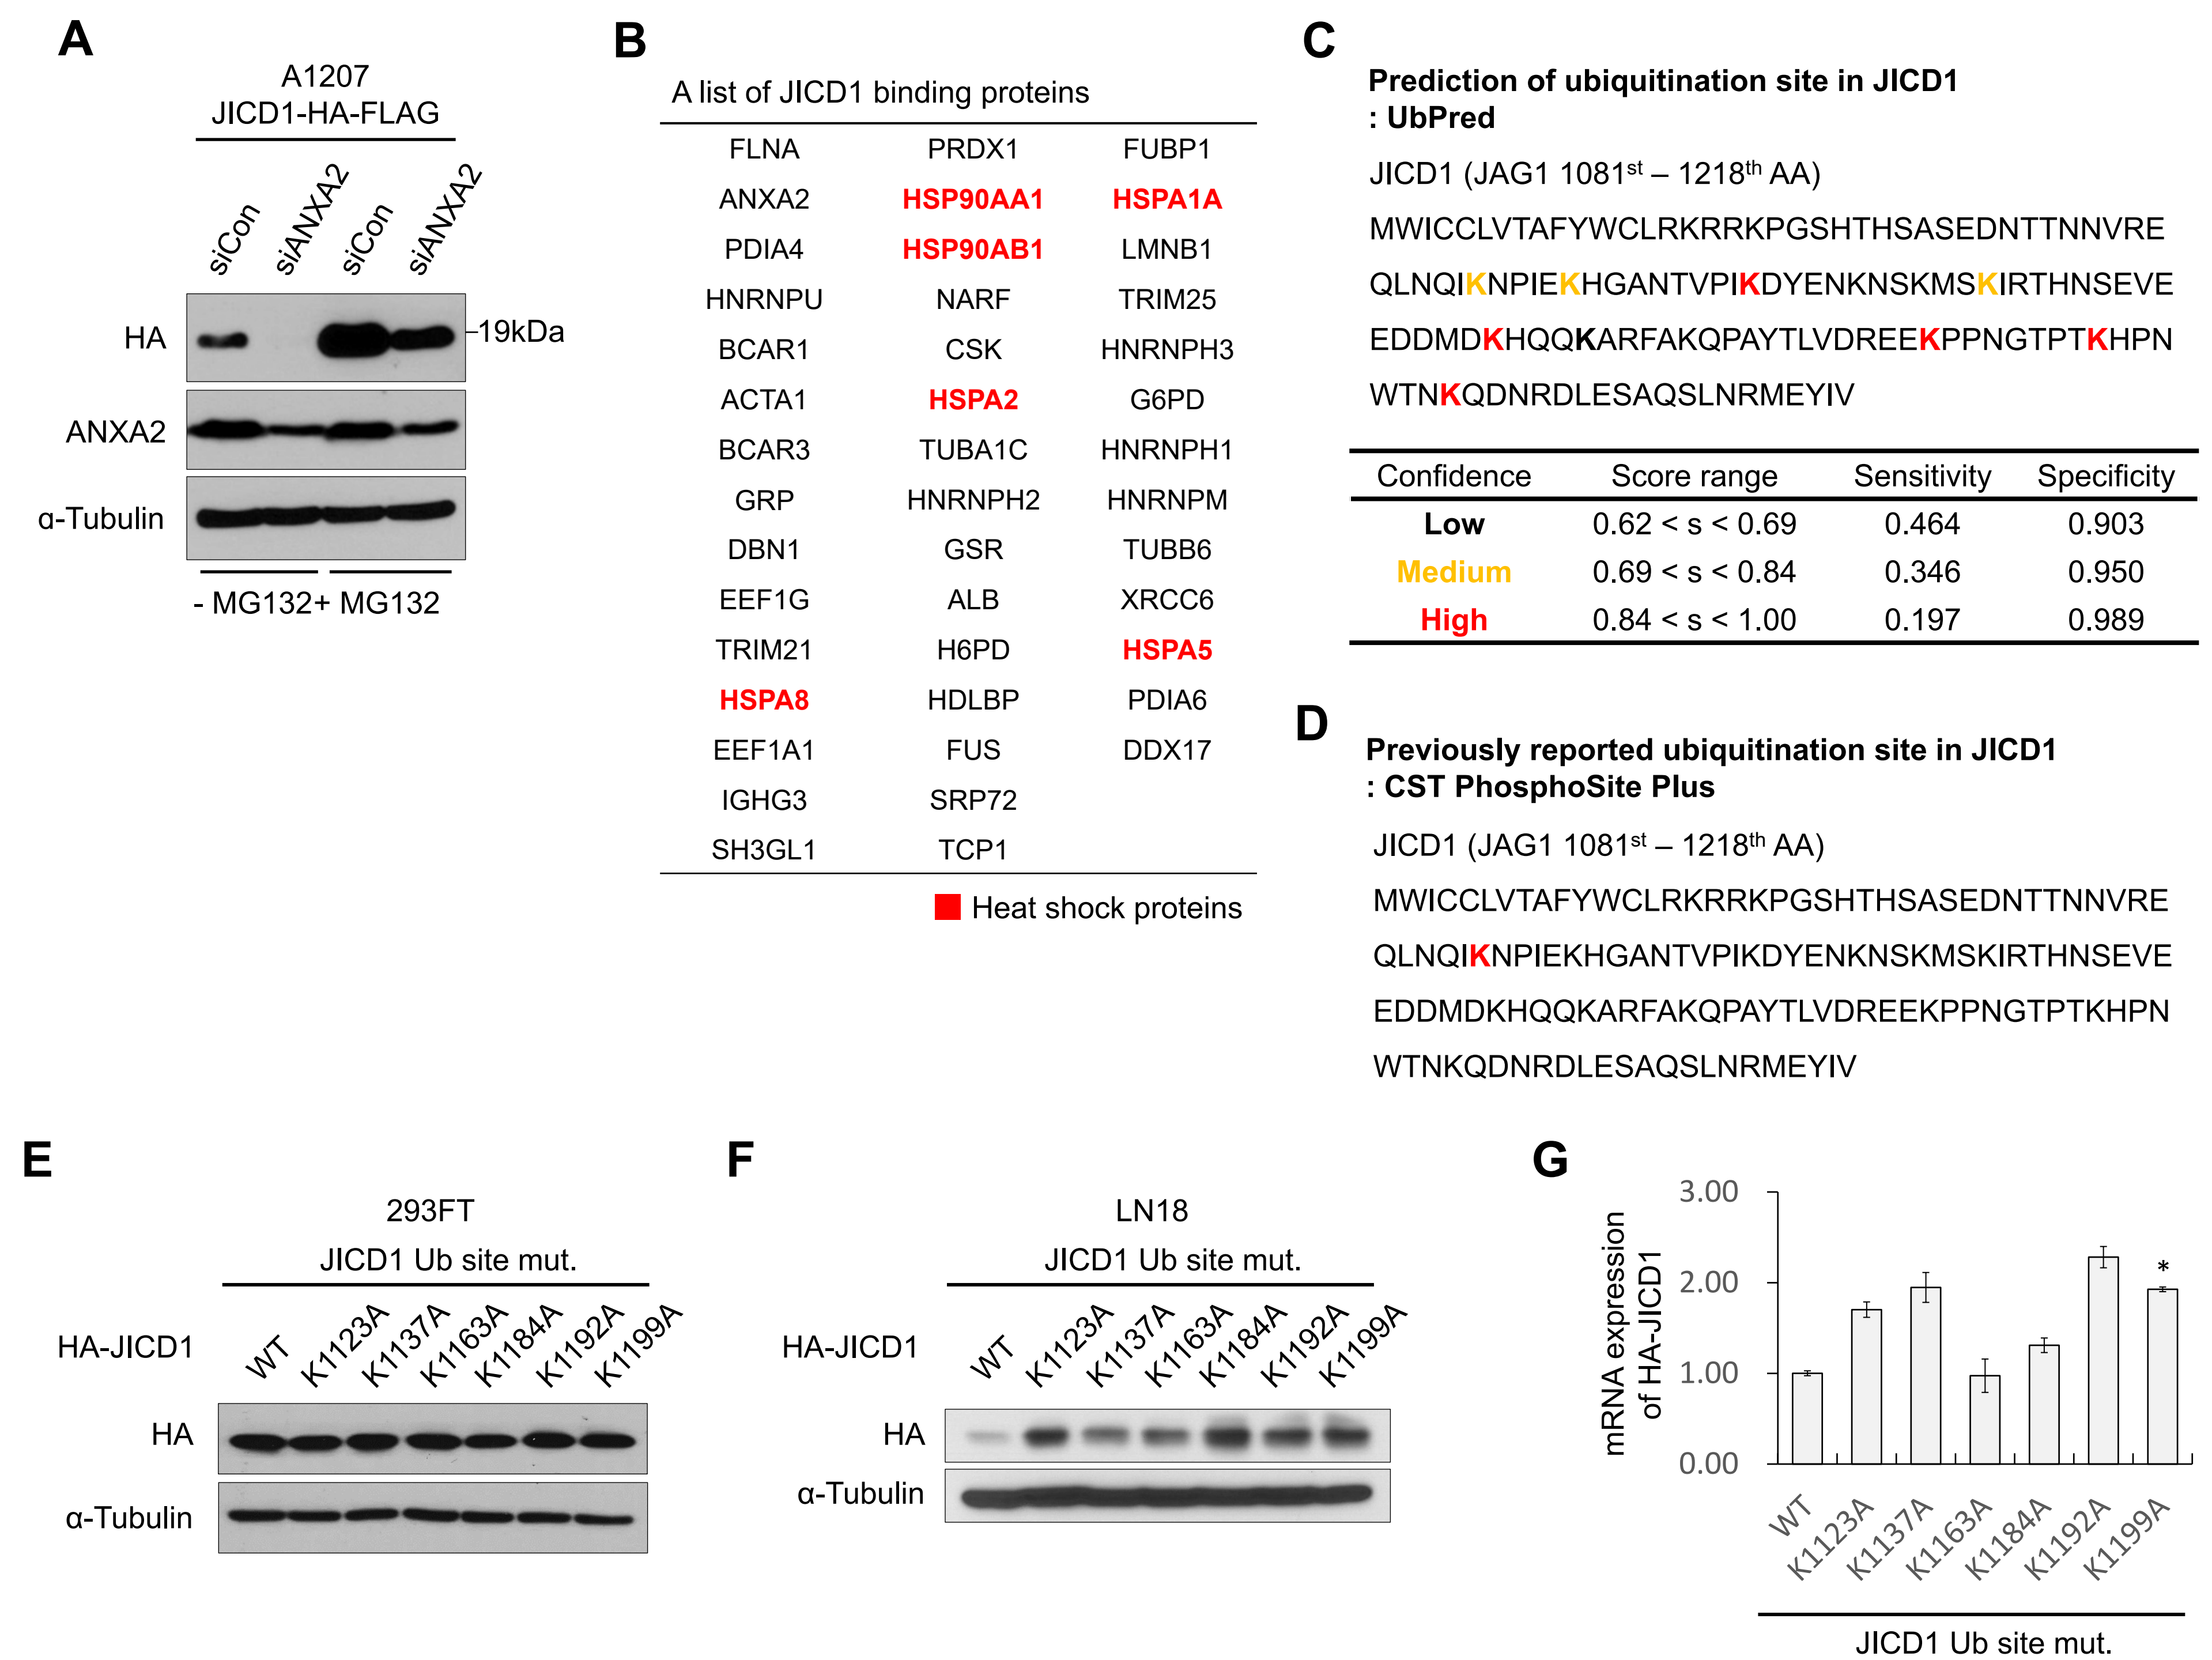

**Supplementary Figure S2. The transcriptional expression of JAG1 was not changed after the ANXA2 knockdown.**

(A) The protein level of JICD1-HA-FLAG following ANXA2 knockdown combined with CQ treatment in A1207-HA-FLAG cells.

(B) A list of HSP70 and HSP90 family proteins detected as JICD1-binding proteins.

(C, D) Possible ubiquitination sites in JICD1 predicted by using the (C) UbPred and (D) CST PhosphoSite Plus.

(E, F) The protein level of JICD1 with mutants in possible ubiquitination sites in (E) HEK 293T and (F) LN18 cells.

(G) Level of JICD1 mRNA with mutants in possible ubiquitination sites in LN18 cells. \*p < 0.05.



A

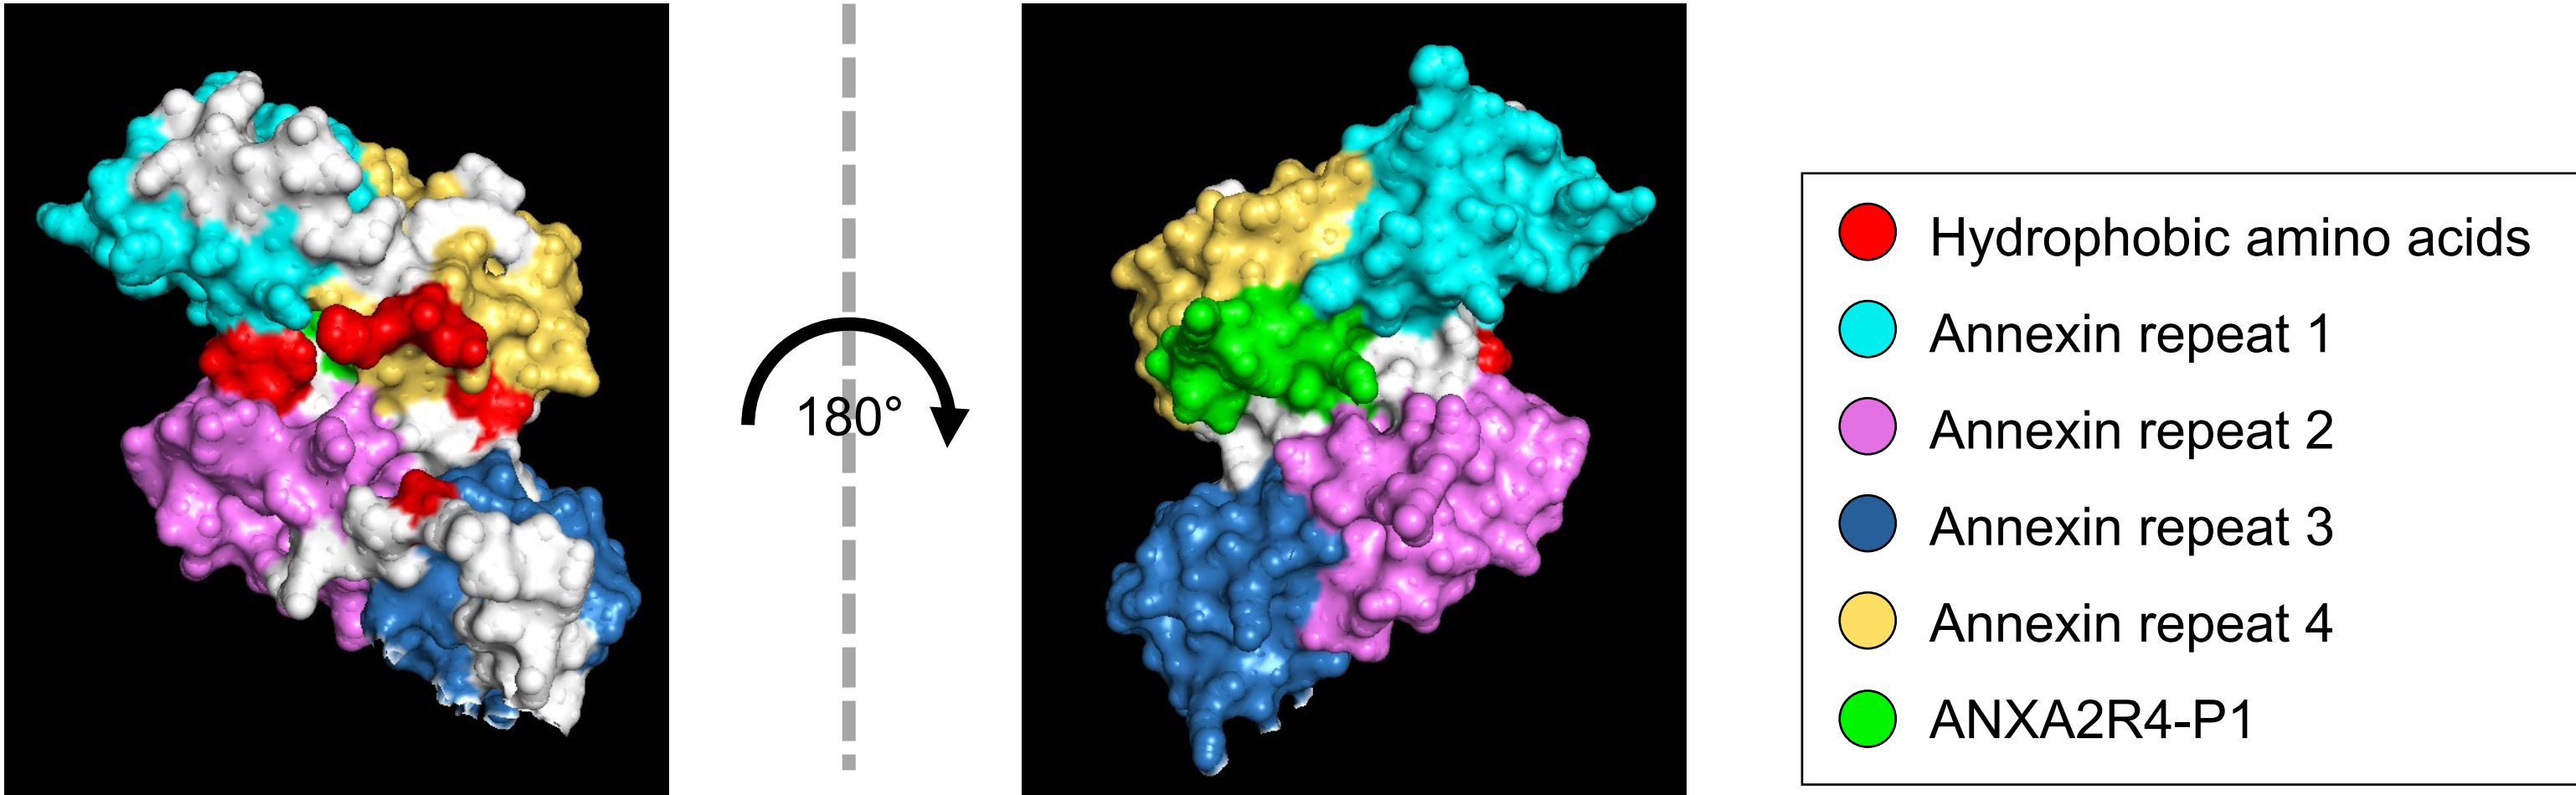

B

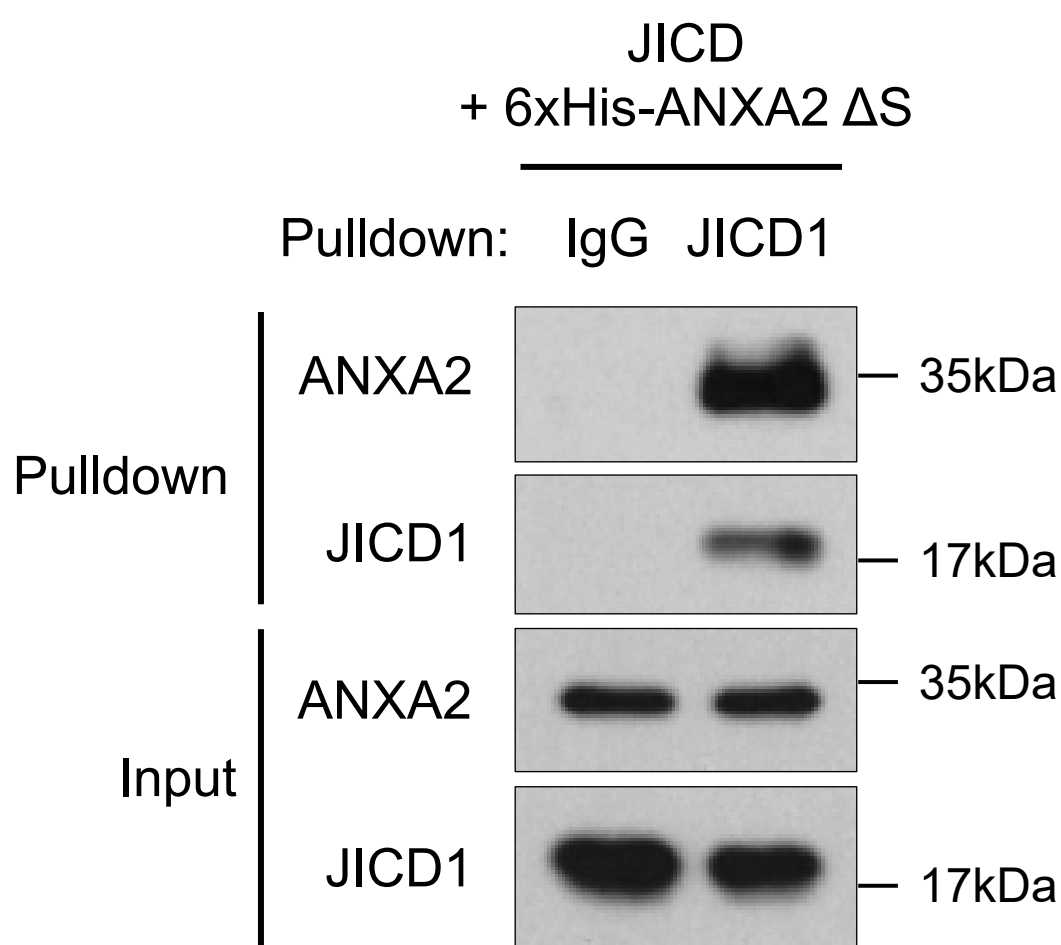

C

| Peptide | Sequence              | Length |
|---------|-----------------------|--------|
| R4P-1   | LYDSMKGKGTRDKVLIRIMVS | 21     |
| R4P-2   | RSEVDMLKIRSEFKRK      | 16     |
| R4P-3   | YGKSLYYYIQQ           | 11     |
| R4P-4   | DTKGDYQKALLYL         | 13     |

D

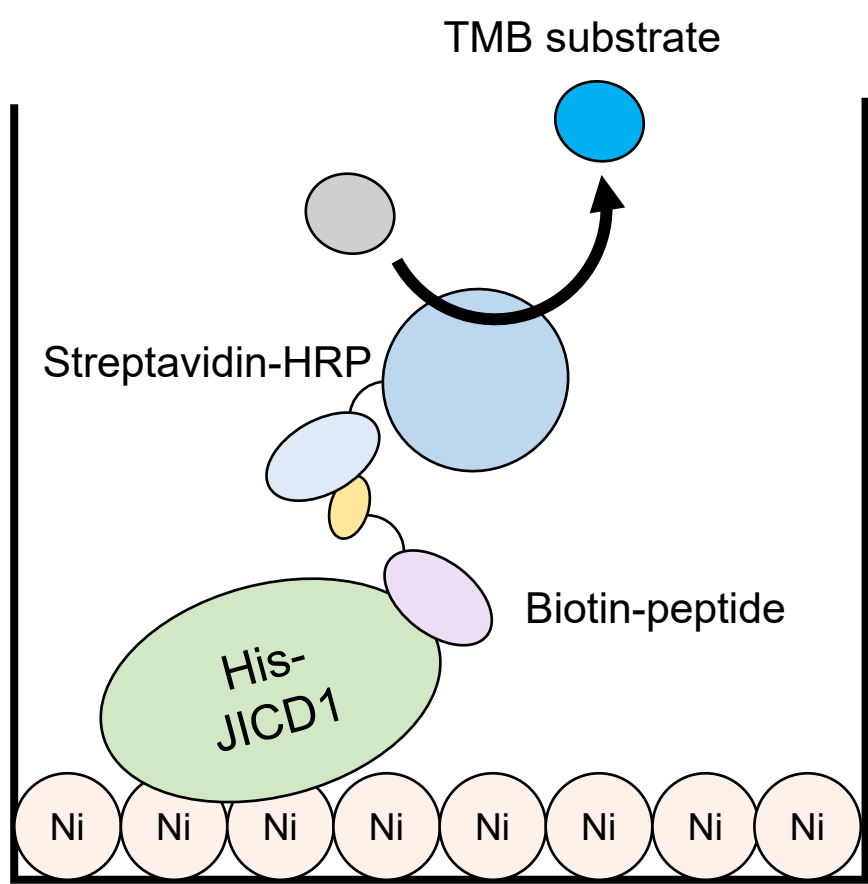

E

|                  | Locus       | Amino acid sequence                 | Similarity |
|------------------|-------------|-------------------------------------|------------|
| ANXA2 R4P-1      |             | LYD-----S-----MKGKGTRDK-V--LIRIMVS  |            |
| ANXA2 isoform 2  | (274 – 294) | LYD-----S-----MKGKGTRDK-V--LIRIMVS  | 100(21/21) |
|                  | (109 – 123) | YDASELKAS-----MKGLGT                | 38(8/21)   |
|                  | (198 – 217) | LYD-----AG-----VKRKGT-D--VPKWISIM   | 57(12/21)  |
| ANXA6 isoform 1  | (260 – 280) | LFK-----A-----MKGLGTRDN-T--LIRIMVS  | 76(16/21)  |
|                  | (608 – 628) | LYK-----S-----MKGAGTDEK-T--LTRIMVS  | 76(16/21)  |
|                  | (103 – 121) | D-----A-----ISGIGTDEK-C--LIEILAS    | 52(11/21)  |
| ANXA1            | (439 – 459) | YD-----AKQLKKAMEGAGTDEK-A--LI       | 47(10/21)  |
|                  | (29 – 35)   | LYT-----A-----MKG                   | 24(5/21)   |
|                  | (376 – 381) | MKGLGT                              | 24(5/21)   |
| ANXA4 isoform a  | (282 – 302) | LHQ-----A-----MKGVGTRHK-A--LIRIMVS  | 71(15/21)  |
|                  | (127 – 143) | MKGLGTDED-T--LIEILAS                | 52(11/21)  |
| ANXA5            | (256 – 276) | LYK-----S-----MKGLGTDND-T--LIRVMVS  | 76(16/21)  |
|                  | (91 – 106)  | LYDVQELRRA-----MKGAGT               | 38(8/21)   |
|                  | (29 – 34)   | MKGLGT                              | 24(5/21)   |
| ANXA11 isoform 1 | (255 – 275) | LYY-----A-----MKGAGTDDH-T--LIRVMVS  | 71(15/21)  |
|                  | (90 – 110)  | LYD-----AYELKHALKGAGTNEK-V--L       | 57(12/21)  |
|                  | (28 – 33)   | MKGLGT                              | 24(5/21)   |
| ANXA8 isoform 1  | (444 – 460) | MRGAGTKDR-T--LIRIMVS                | 62(13/21)  |
|                  | (213 – 215) | MKG                                 | 14(3/21)   |
| ANXA13 isoform a | (300 – 320) | LYY-----A-----MKGAGTRDG-T--LIRNIVS  | 67(14/21)  |
|                  | (140 – 160) | LHD-----A-----MKGLGTKEG-V--LIEILAS  | 62(13/21)  |
|                  | (30 – 36)   | LYK-----S-----MKG                   | 28(6/21)   |
| ANXA7 isoform 1  | (254 – 273) | LYK-----S-----MKGAGTDEE-T--LIRIVV   | 67(14/21)  |
|                  | (99 – 110)  | MKGLGTDES-V--LI                     | 43(9/21)   |
|                  | (148 – 154) | LKKILVS                             | 19(4/21)   |
| ANXA9            | (28 – 32)   | KGMGT                               | 19(4/21)   |
|                  | (403 – 422) | LYY-----A-----MKGAGTDDS-T--LVRIVV   | 62(13/21)  |
|                  | (239 – 259) | YD-----AWSLRKAMQGAGTQER-V--LI       | 47(10/21)  |
| ANXA3            | (176 – 178) | MKG                                 | 14(3/21)   |
|                  | (292 – 299) | V--LIRILIS                          | 28(6/21)   |
|                  | (184 – 188) | KGGRD                               | 10(2/21)   |
| ANXA10           | (102 – 114) | S-----MKGAGTNED-A--LI               | 38(8/21)   |
|                  | (35 – 45)   | GTDEK-M--LISIL                      | 28(6/21)   |
|                  | (262 – 278) | LKGIGT-DEFT--LNRIMVS                | 47(10/21)  |
| ANXA2R4P-1       | (226 – 230) | D-----S-----IKG                     | 19(4/21)   |
|                  | (92 – 118)  | LYD-----AHELWHAMKGVGTDEN-C--LIEILAS | 57(12/21)  |
|                  | (267 – 275) | NK-T--VIRILI                        | 19(4/21)   |

F

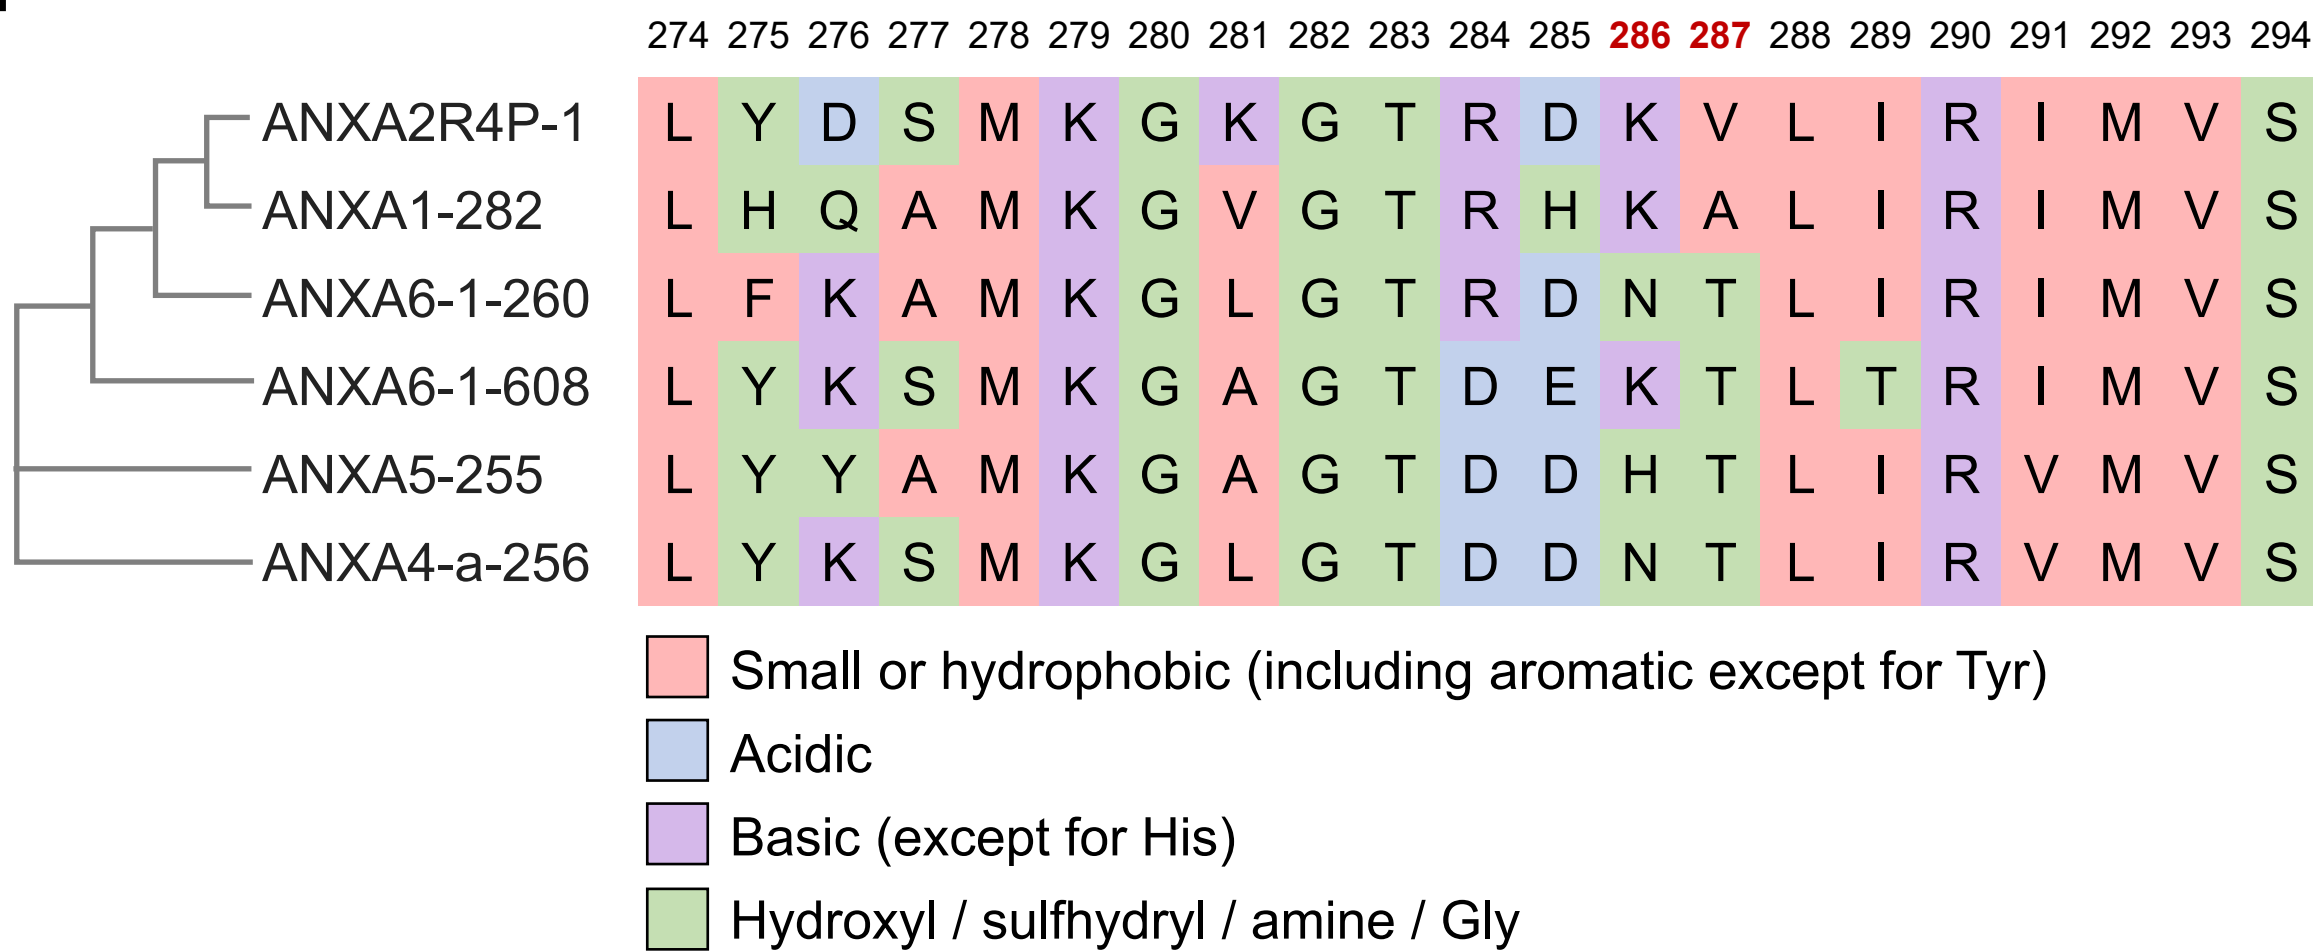

**Supplementary Figure S3. R4P-1 region of ANXA2 directly binds to JICD1.**

- (A) Three-dimensional structural presentation of ANXA2 (PDB: 1XJL) with an indication of Annexin repeats, R4P-1.
- (B) In vitro binding assay using the recombinant JICD1 and 6xHis-tagged ANXA2 lacking S domain (ANXA2 $\Delta$ S).
- (C) Sequences of ANXA2 R4 peptides, R4P-1, 2, 3, and 4.
- (D) A graphic description of the JICD1-peptide binding assay.
- (E) The result from the Basic Local Alignment Search Tool search for the proteins having a similar amino acid sequence to R4P-1.
- (F) Clustering of the amino acid sequences of the peptides used in Figure S2E.



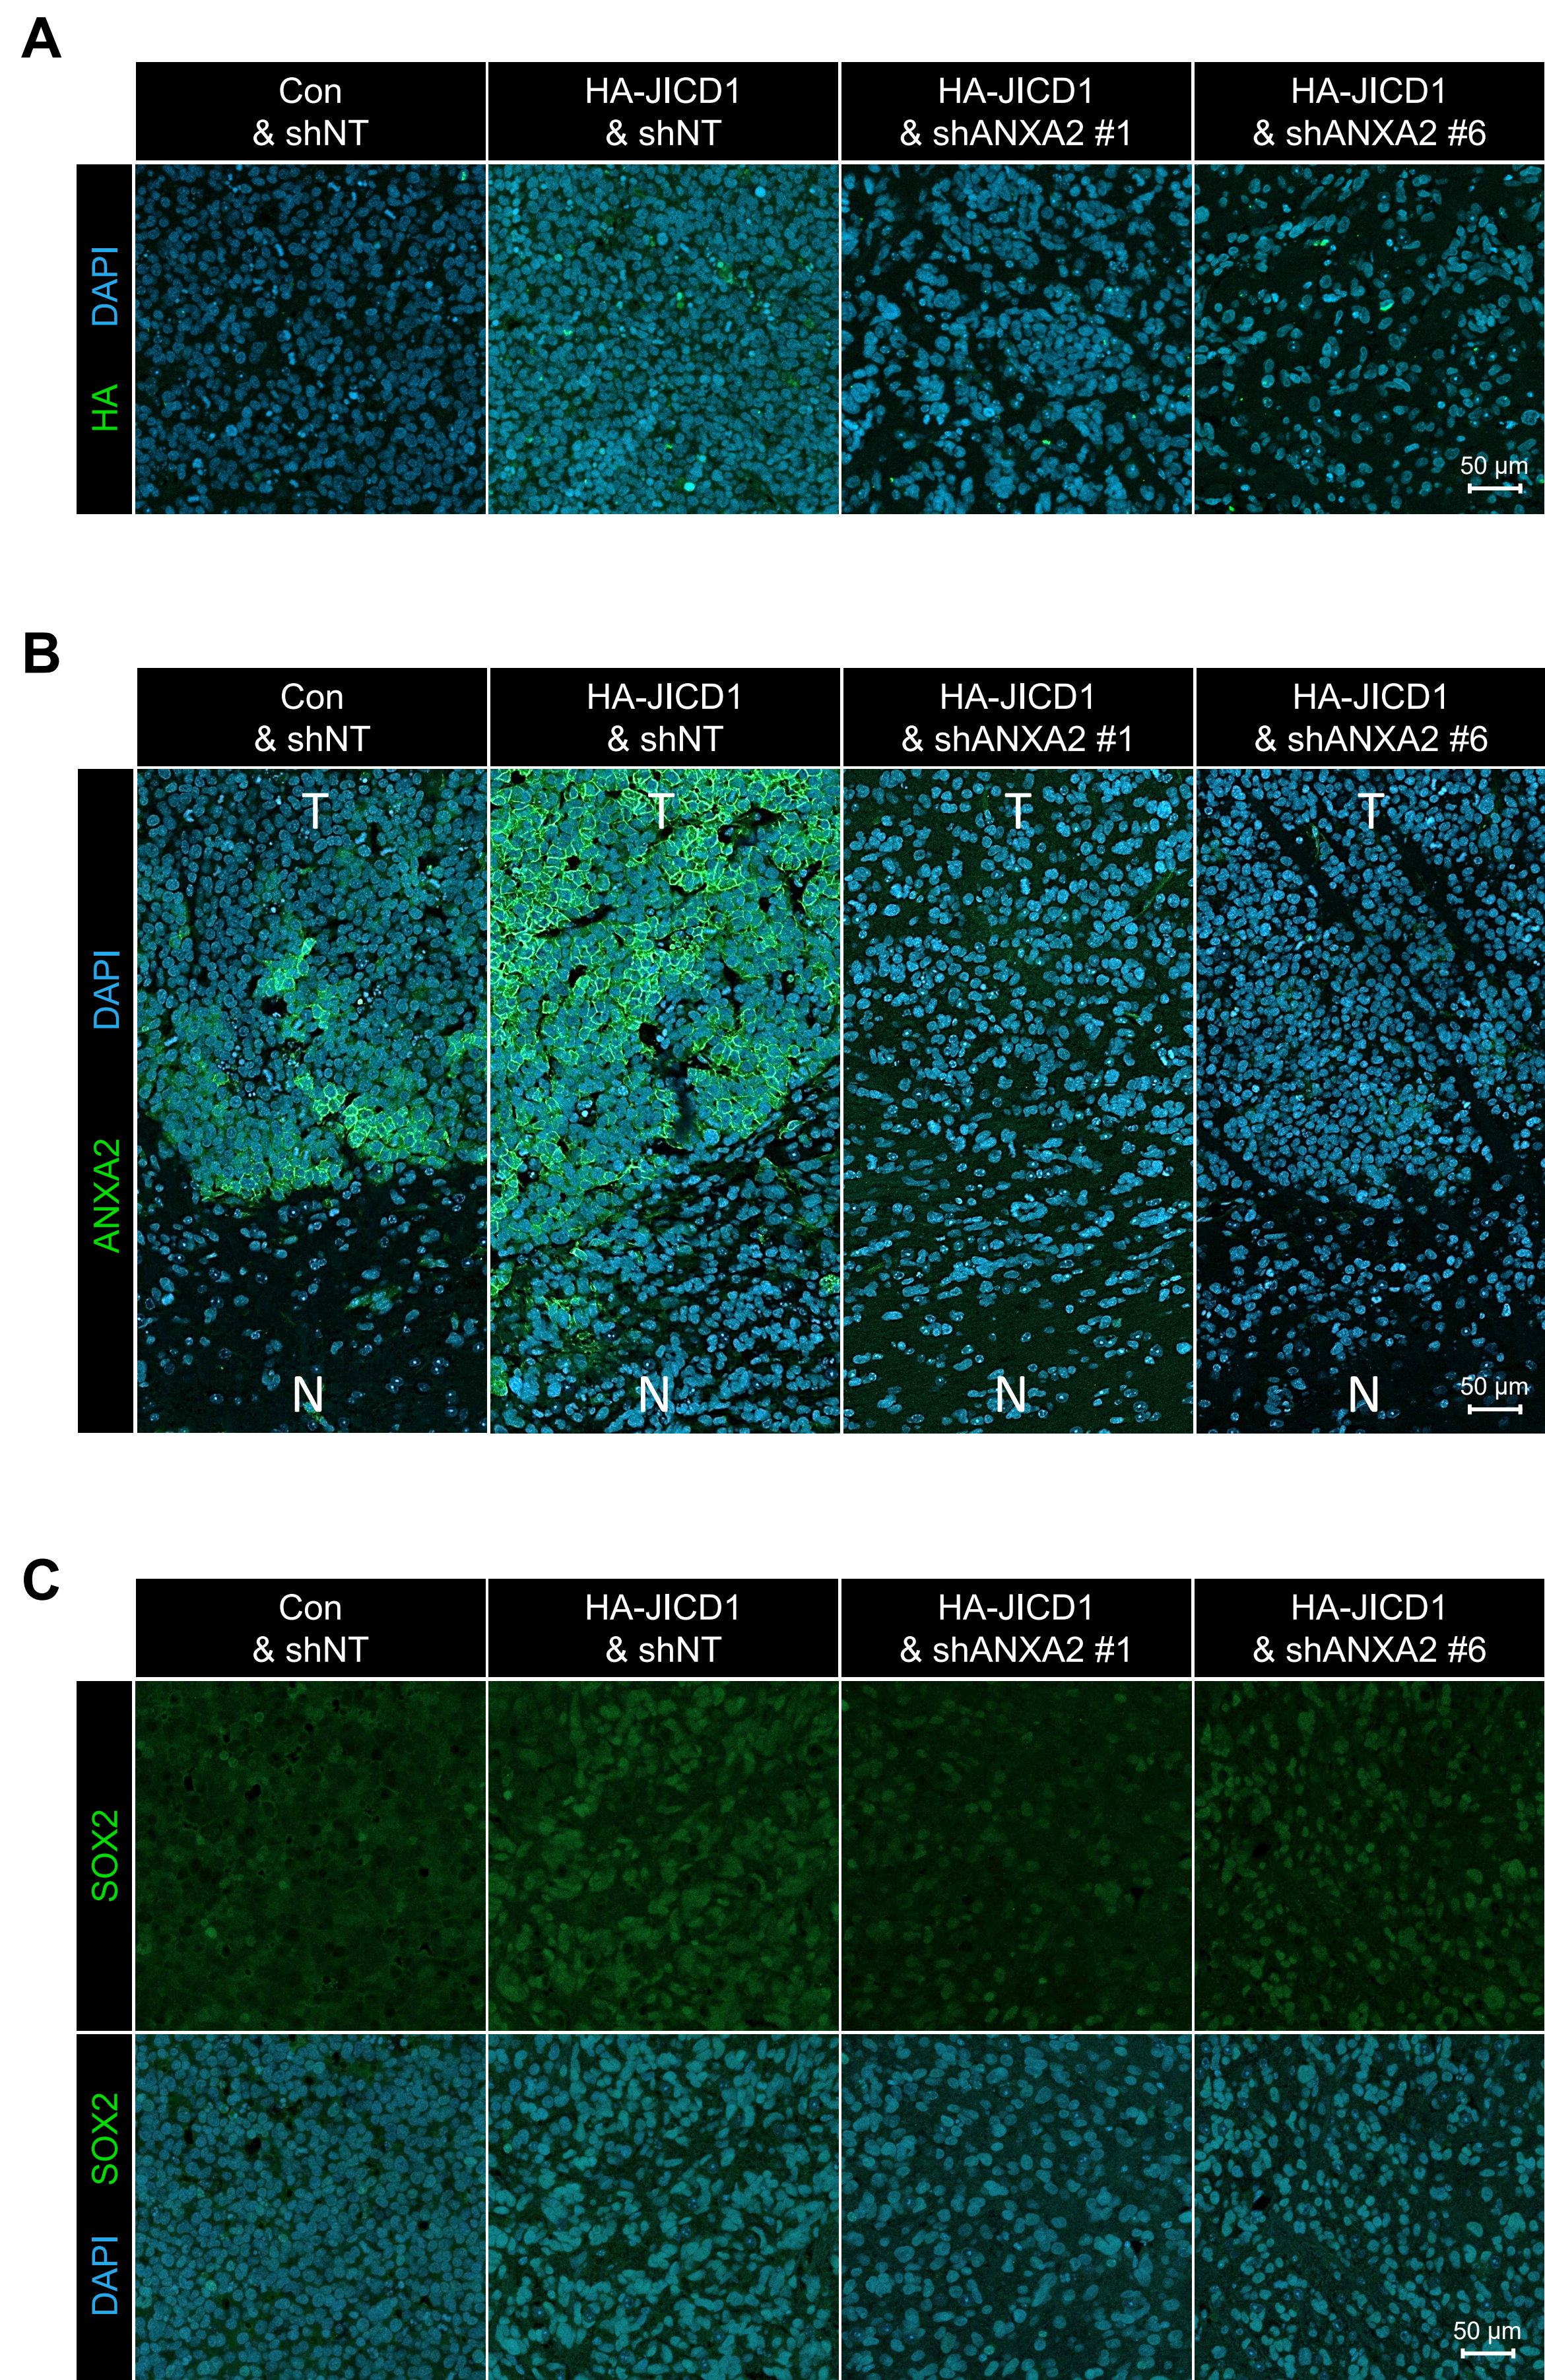

**Supplementary Figure S4.** Immunofluorescence images for (A) HA-JICD1, (B) ANXA2, and (C) SOX2. T: Tumor, N: Normal. Scale bar = 50  $\mu$ m.



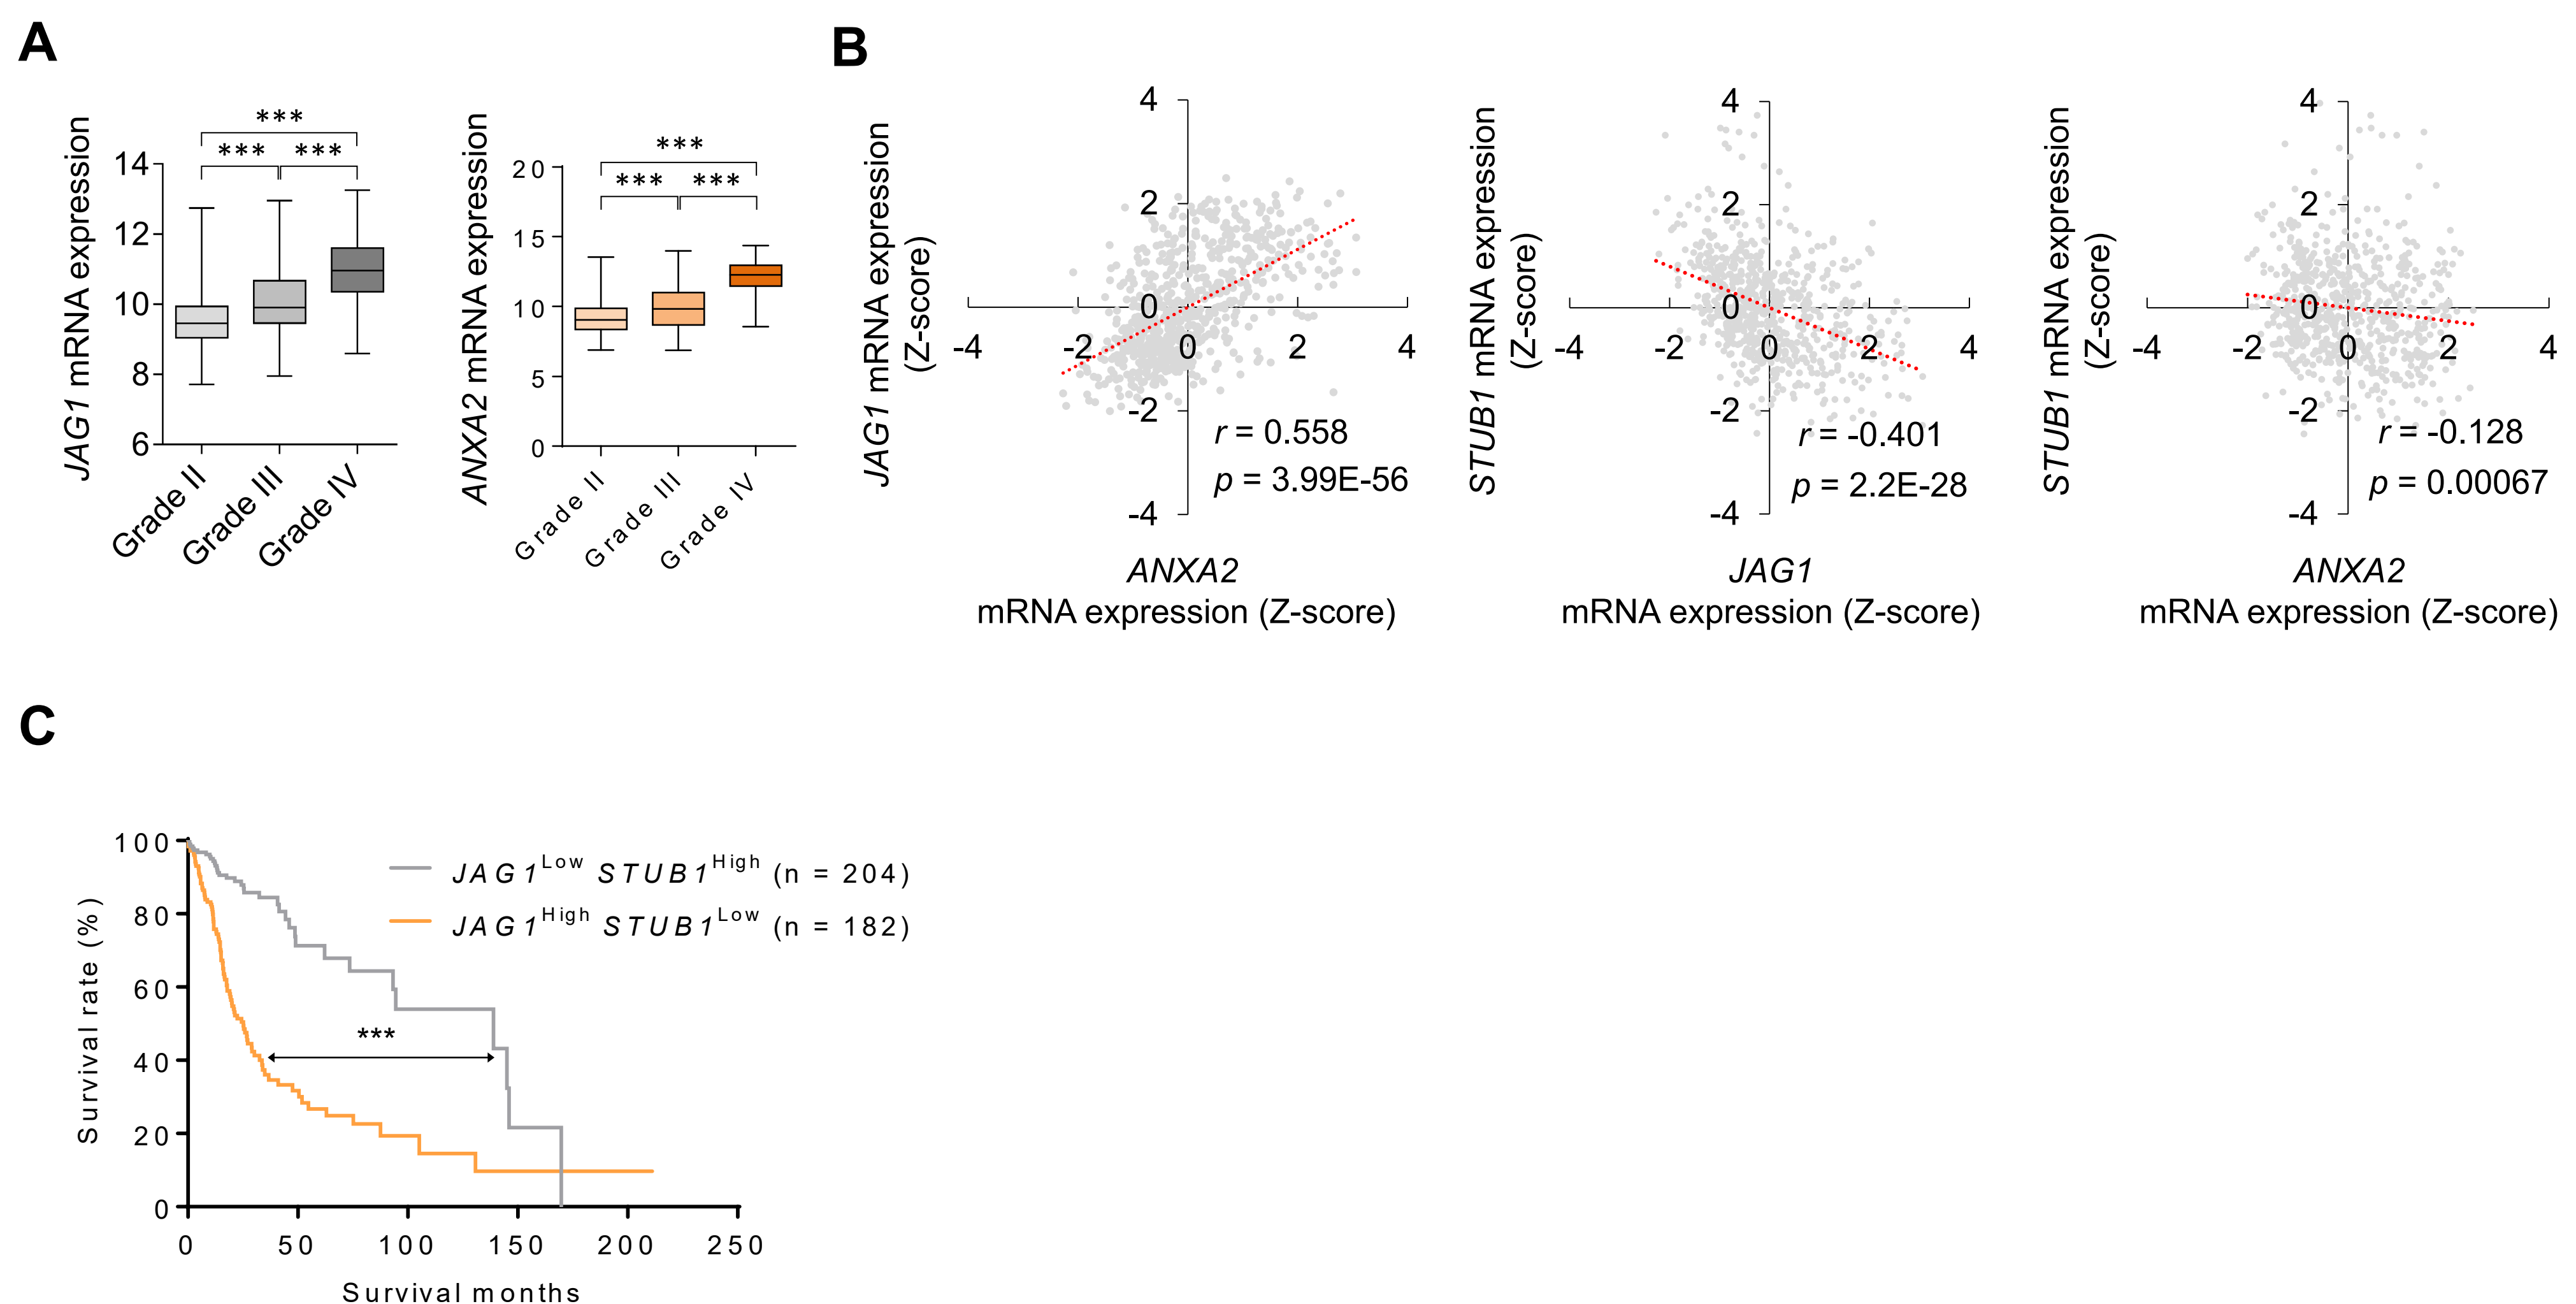

**Supplementary Figure S5. JICD1–ANXA2 interaction correlates with cancer aggressiveness in patients with glioma.**

(A) The mRNA expression levels of *JAG1* (left) and *ANXA2* (right) in GBM patients depending on the WHO grade. Unpaired two-tailed t-tests: \*\*\* $p < 0.001$ .

(B) Correlation between *JAG1*, *ANXA2*, and *STUB1* in TCGA database.

(C) Survival time of patients with glioma according to expressions of *ANXA2* and *STUB1*. The patients were divided into two groups (*JAG1* high and *STUB1* low versus *JAG1* low and *STUB1* high) based on their mRNA expression (mean  $\pm$  SEM).  $p$ -value was calculated with a log-rank (Mantel-Cox) test. \*\*\* $p < 0.001$ .
